# Supplementary material for: Hierarchical dinucleotide distribution in genome along evolution and its effect on chromatin packing
Source: Life Sci Alliance. 2021 Jun 24;4(8):e202101028. doi: 10.26508/lsa.202101028 (PMC8321668; doi:10.26508/lsa.202101028)
Supplement: Supplementary file 2 [file LSA-2021-01028_TableS1.xlsx]

## Sheet: Sheet1
Species name	genome name
elephant	loxAfr3
gorilla	gorgor5
human	hg19
microbat	myoluc2
mouse	mm10
rat	rn6
Naked_mole_rat	hetgla2
platypus	ornana2
cow	bosTau8
dog	canfam3
manatee	triMan1
pig	susScr11
rabbit	oryCun2
Brown_kiwi	aptMan1
budgerigar	melUnd1
Golden_eagle	aquChr2
Medium_ground_finch	geoFor1
turkey	melGal5
chicken	galgal
Zebra_finch	taeGut2
lizard	anocar2
Painted_turtle	chrPic1
X_tropicalis	xenTro9
African_clawed_frog	xenLae2
medaka	oryLat2
Nile_tilapia	orenil2
zebrafish	danrer11
fugu	fr3
tetraodon	tetNig2
lancelet	braFlo1
coelacanth	latCha1
S_purpuratus	strPur2
C_elegans	ce11
D_melanogaster	dm6
S_cerevisiae	sacCer3
rice
A_thaliana
E_coli
alligator	allMis1
Table S1. The genomes of species used including bacteria, plants, invertebrates, fishes, reptiles, mammals, and birds. Genomes of species were retrieved from databases at UCSC and NCBI.
