# Supplementary material for: Hierarchical dinucleotide distribution in genome along evolution and its effect on chromatin packing
Source: Life Sci Alliance. 2021 Jun 24;4(8):e202101028. doi: 10.26508/lsa.202101028 (PMC8321668; doi:10.26508/lsa.202101028)
Supplement: Supplementary file 3 [file LSA-2021-01028_TableS2.xlsx]

## Sheet: Sheet1
Species name	Variability calculated using 2σ	Species name	Variability calculated using 3σ
S_cerevisiae	3.14048	S_cerevisiae	4.09461
E_coli	3.42437	E_coli	4.23948
D_melanogaster	3.4763	D_melanogaster	4.31158
C_elegans	3.6748	S_purpuratus	4.46802
lancelet	3.72841	C_elegans	4.50561
S_purpuratus	3.74366	lancelet	4.61928
fugu	3.83579	fugu	4.71331
A_thaliana	3.96255	A_thaliana	4.80709
rice	3.9665	rice	4.8397
Tetraodon	3.98929	Tetraodon	5.00177
zebrafish	4.02345	zebrafish	5.02509
African_clawed_frog	4.11265	African_clawed_frog	5.10572
medaka	4.13357	medaka	5.12941
Coelacanth	4.2417	Coelacanth	5.20029
Nile_tilapia	4.2865	Nile_tilapia	5.31219
X_tropicalis	4.79154	X_tropicalis	5.99295
lizard	5.13419	lizard	6.37216
platypus	5.6067	platypus	7.03497
Rabbit	5.87085	Rabbit	7.22118
Painted_turtle	6.09089	Painted_turtle	7.60266
microbat	6.34063	microbat	7.86965
Minke_whale	6.4508	Minke_whale	8.0911
rat	7.11052	Manatee	8.75525
pig	7.30364	rat	8.76976
Manatee	7.37901	pig	8.98659
cow	7.60848	elephant	9.07507
elephant	7.66583	cow	9.32352
Gorilla	7.77369	human	9.3316
human	7.82235	Gorilla	9.50751
alligator	7.95491	alligator	9.56404
mouse	8.16615	mouse	10.0766
Brown_kiwi	8.32089	Brown_kiwi	10.2033
Turkey	8.71093	Turkey	10.4812
dog	8.84555	Goldern_eagle	10.6562
Goldern_eagle	8.95961	dog	10.7657
naked_mole_rat	9.91866	naked_mole_rat	11.9575
Medium_ground_finch	10.1608	Medium_ground_finch	12.0187
Budgerigar	11.0678	Budgerigar	13.199
Zebra_finch	11.9352	Zebra_finch	14.1251
chicken	12.1399	chicken	14.3257
Table S2. Comparison of the CpG Vvariability of species calculated using threshold 2σ and 3σ, respectively. The relative order of CpG Variability of different species only shows a little difference.
