# Supplementary material for: Hierarchical dinucleotide distribution in genome along evolution and its effect on chromatin packing
Source: Life Sci Alliance. 2021 Jun 24;4(8):e202101028. doi: 10.26508/lsa.202101028 (PMC8321668; doi:10.26508/lsa.202101028)
Supplement: Supplementary file 9 [file LSA-2021-01028_TableS8.xlsx]

## Sheet: Sheet1
Species	Cell type	Pearson correlation
chicken	DT40	0.8773
mouse	liver	0.9067
human	IMR90	0.8809
zebrafish	muscle	0.9646
A.thaliana	seedling	0.8237
yeast	/	0.9011
S.acidocaldarius	/	0.976
Table S8. Max absolute value of Pearson correlation of compartment vector and structure vector of species.
